# Supplementary material for: Cavin-2 regulates the activity and stability of endothelial nitric-oxide synthase (eNOS) in angiogenesis
Source: PubMed Central journal article supplement (PMC5663877; doi:10.1074/jbc.m117.794743), 2017-09-14
Supplement: 10.1074_M117.794743_jbc.M117.794743-1.pdf [file 10.1074_M117.794743_jbc.M117.794743-1.pdf]

# Supplemental figure S1

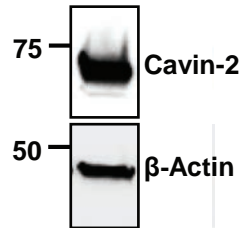

**Figure S1.** Immunoblot of whole cell lysates (WCL) from human retinal microvascular endothelial cells (HRMVEC) using  $\alpha$ -Cavin-2 and  $\alpha$ - $\beta$ -Actin antibodies.

# Supplemental figure S2

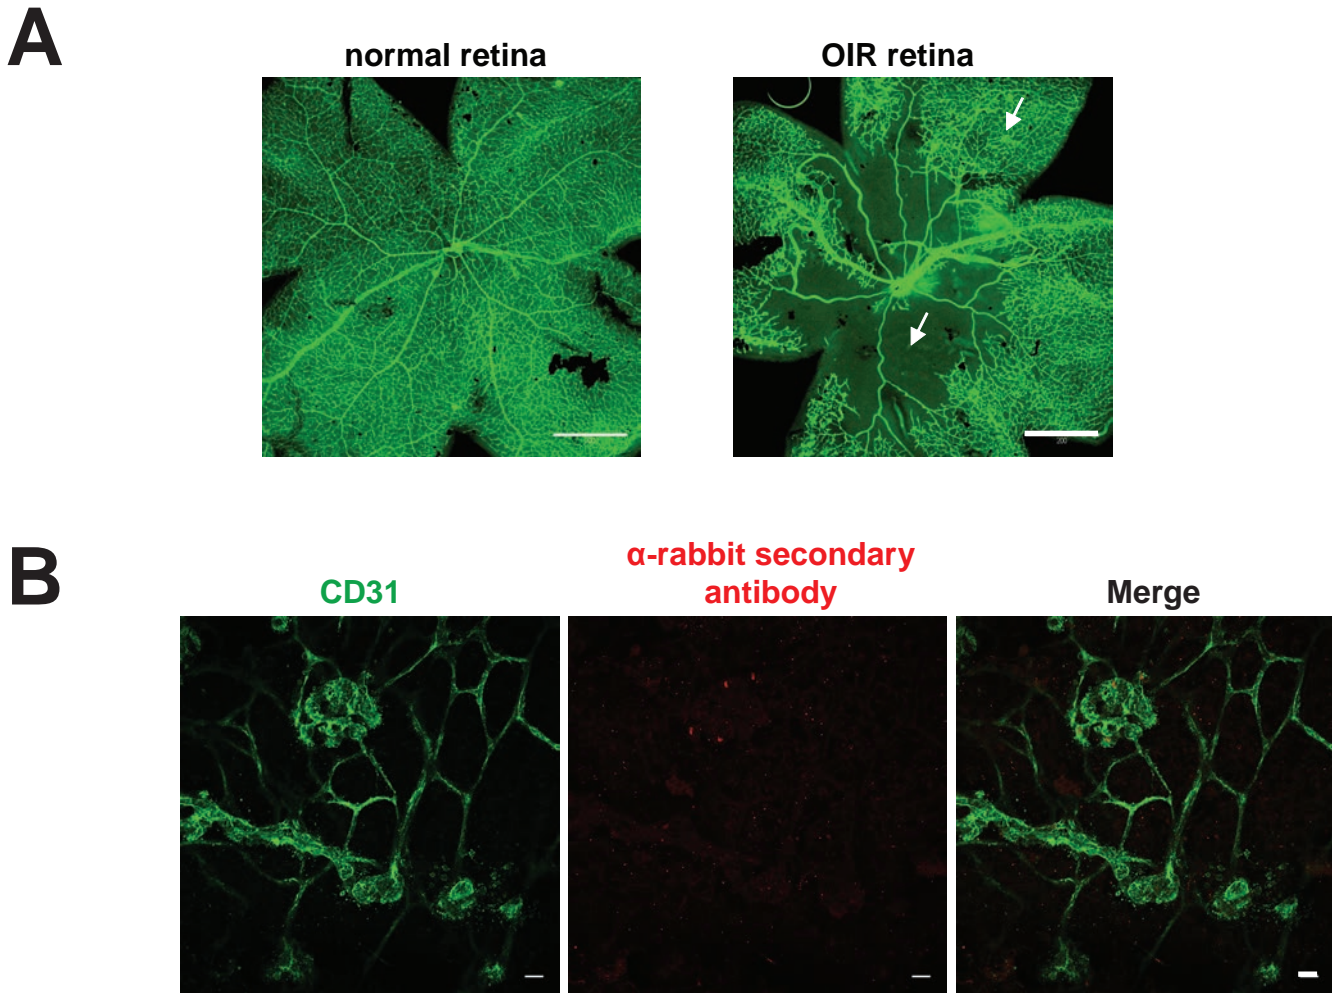

**Figure S2.** A. CD31 staining in retina of mice maintained in normal oxygen (normal retina) or kept in hyper-oxygen (70%) chamber from P7 to P12 and back to normal room air until P17 (OIR retina). The top and bottom arrows indicate neovascular tufts and the vaso-obliteration (VO) induced by hyper-oxygen in OIR retina, respectively. Scale 200 $\mu$ m B. Immunofluorescence staining of CD31 and  $\alpha$ -rabbit secondary antibody on neovascular tufts using OIR in mice.

# Supplemental figure S3

## A

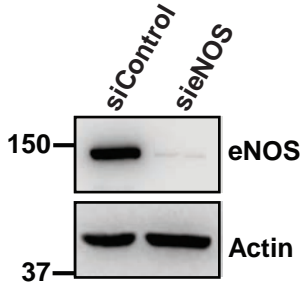

## B

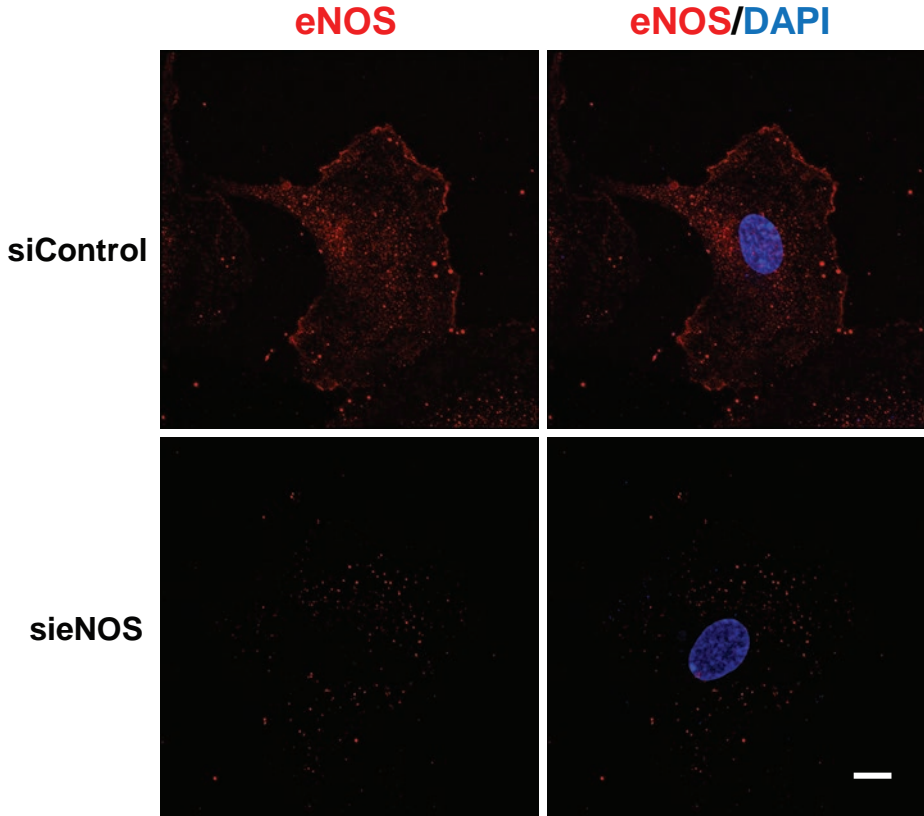

**Figure S3.** A. Immunoblot of whole cell lysates from HUVECs using eNOS and beta-Actin antibodies after knockdown of non-targeting pool (siControl) and eNOS (siNOS) siRNAs. B. Immunofluorescence of eNOS on siControl and siNOS HUVECs. The images are maximum intensity projections recorded using confocal microscope. Scale bar: 10  $\mu$ m

# Supplemental figure S4

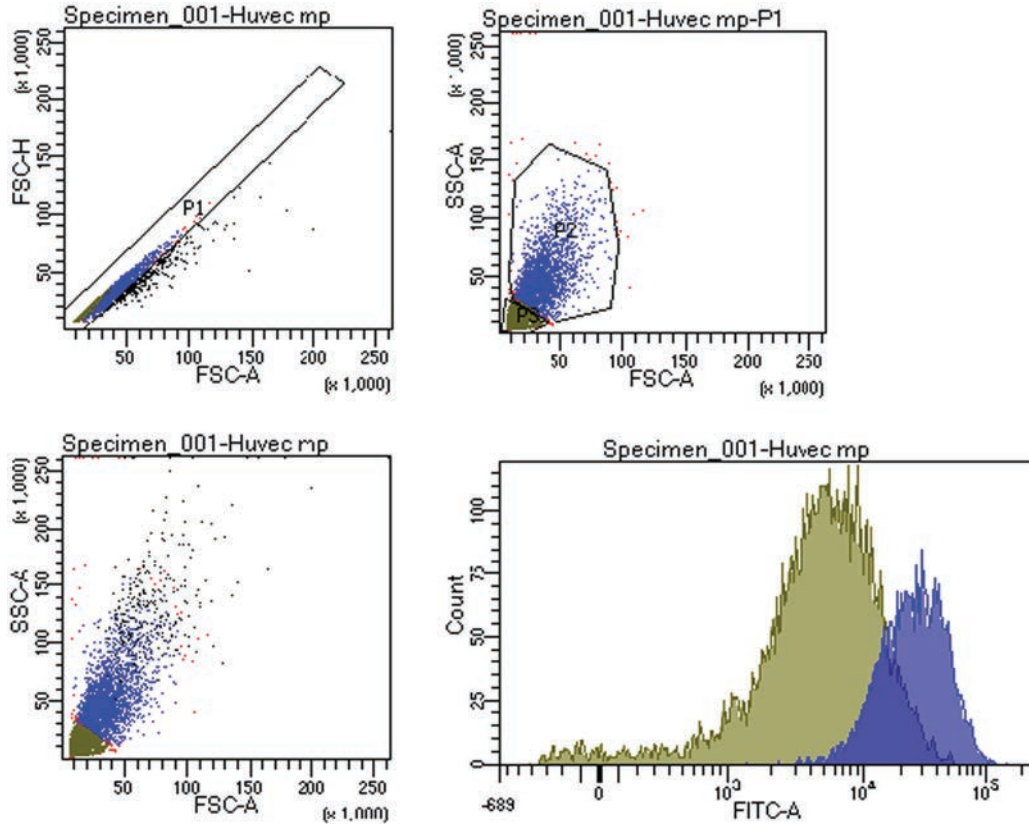

**Figure S4.** Validation of endothelial microparticles (EMP). EMPs were isolated from HUVECs as mentioned in methods and stained for Annexin-V using Annexin-V-Fluos labelling reagent for one hour at room temperature. The annexin-V stained EMPs were sorted using flow cytometry. The EMPs of size between 0.1-1.0  $\mu\text{m}$  were selected using nano blank polystyrene beads.
